# Supplementary material
Source: MDPI journal article supplement (https://www.mdpi.com/1424-8247/16/5/689)

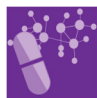

## Supplementary Material

for

# ***Margaritaria nobilis* L.f. (Phyllanthaceae) Ethanolic Extract: Low Acute Oral Toxicity and Antinociceptive Activity**

Fabiana Menezes S. Camara <sup>1</sup>, Brenda Costa da Conceição <sup>1,2</sup>, Eloise Karoline S. Cardoso <sup>1,2</sup>,  
Johan Carlos C. Santiago <sup>3</sup>, Carlos Alberto B. Albuquerque <sup>3</sup>, Washington L. Pereira <sup>4</sup>, Marta C. Monteiro <sup>2</sup>,  
Consuelo Y. Yoshioka e Silva <sup>2,3</sup>, Milton Nascimento da Silva <sup>2,3</sup>, Cristiane F. Maia <sup>1,2</sup> and Eneas A. Fontes-Junior <sup>1,2,\*</sup>

<sup>1</sup> Laboratory of Inflammation and Behavioral Pharmacology (Lafico), Health Science Institute,  
Federal University of Pará, Belém 66075110, PA, Brazil

<sup>2</sup> Pharmaceutical Sciences Post-Graduation Program, Health Sciences Institute, Federal University of Pará,  
Belém 66075110, PA, Brazil

<sup>3</sup> Laboratory of Liquid Chromatography (Labcrol), Exact and Natural Sciences Institute,  
Federal University of Pará, Belém 66075110, PA, Brazil

<sup>4</sup> Animal Pathology Laboratory, Amazon Federal Rural University, Belém 66077830, PA, Brazil

\* Correspondence: efontes@ufpa.br



**Figure S1** | Histological evaluation of the stomach (**A** – Control and **B** – MnE; Barr - 200µm), kidney (**C** – Control and **D** – MnE; cortex; Barr - 100µm), liver (**E** – Control and **F** – MnE; Barr - 100µm), and heart (**G** – Control and **H** – MnE; Barr - 100µm) of rats acutely treated with MnE limit dose (2,000 mg/kg; orally). Hematoxylin and eosin staining. No changes indicative of toxicity was identified. All samples showed histological normality.

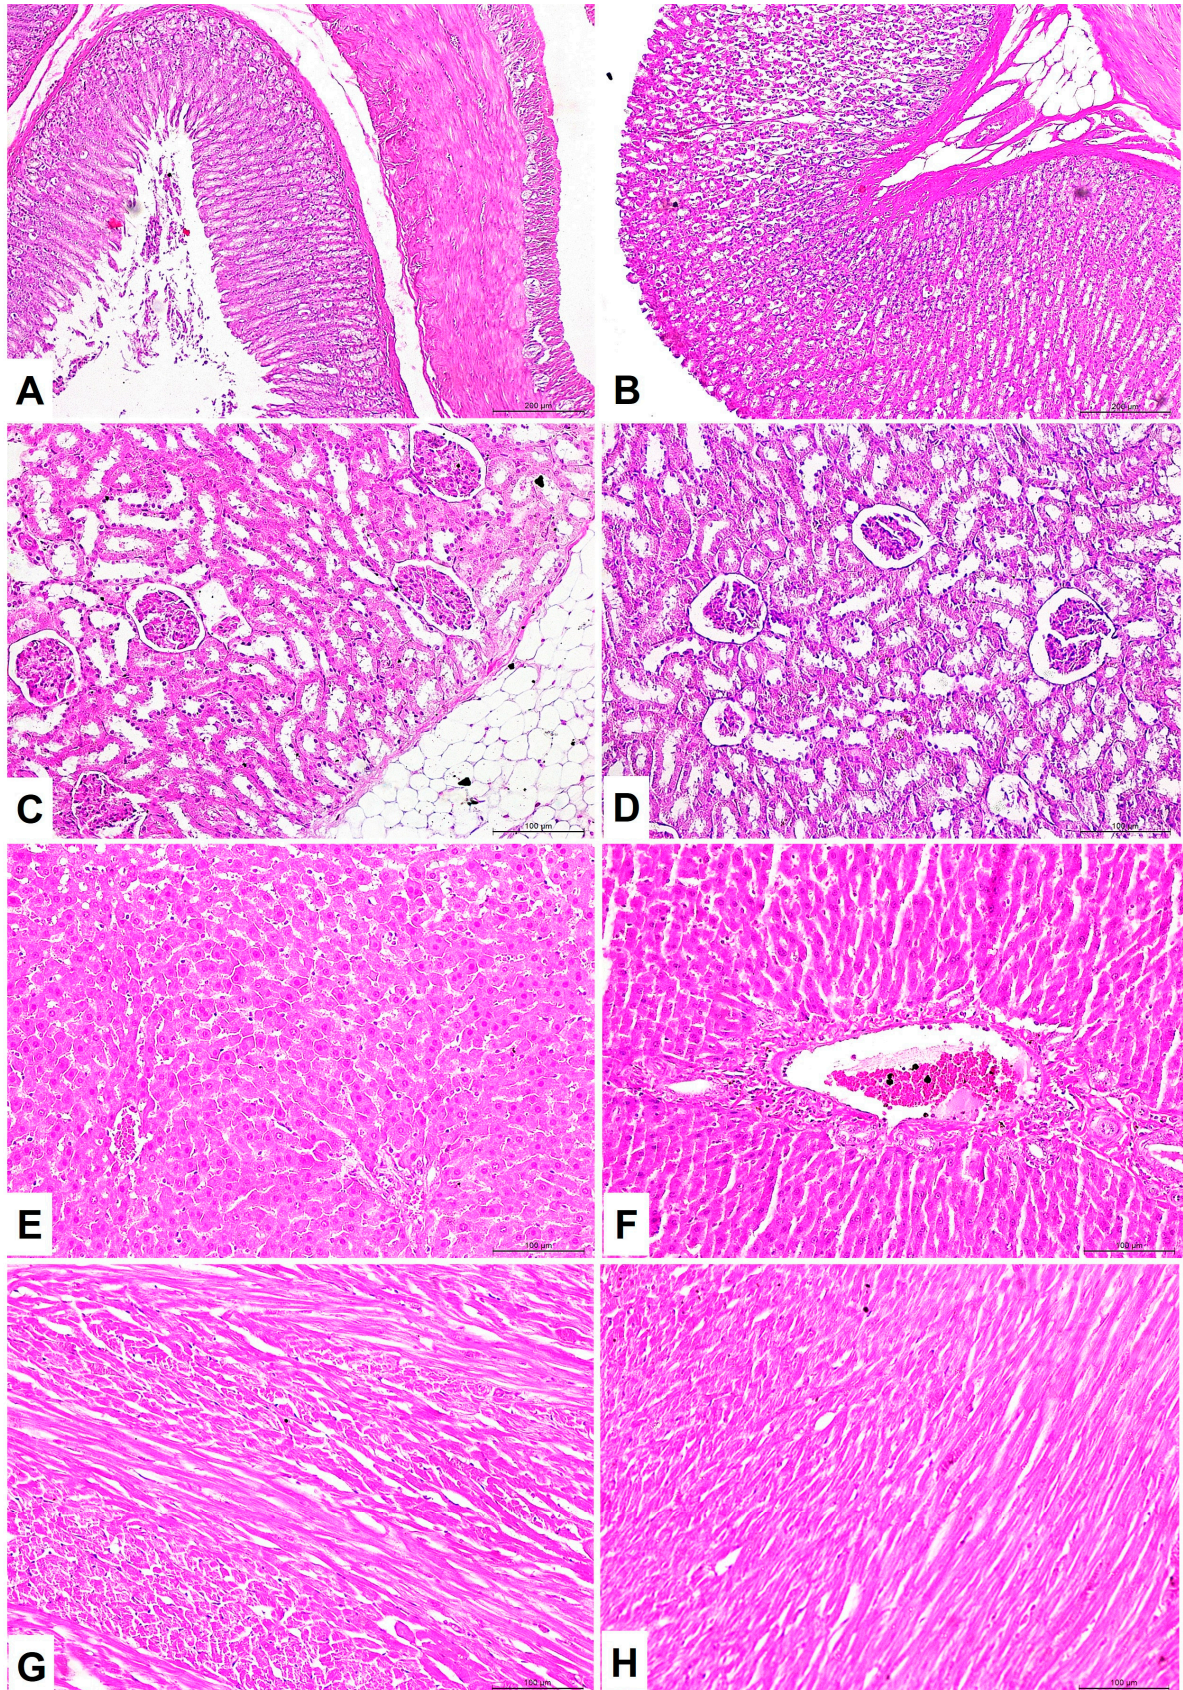

Supplement: s1 [file s1]
